# Supplementary material
Source: ML conference proceedings conference paper supplement (https://openreview.net/forum?id=ST72dbOvwx)
Supplement: supplementary_material [file attachment]

# 1 Supplementary Materials

Table 1: Available clinical features in the UK Biobank. Binary features marking the presence or absence of a specific comorbidity have no unit.

| Category                           | Feature (unit)                                                | Type        | UKB Field ID |
|------------------------------------|---------------------------------------------------------------|-------------|--------------|
| <b>Demographics</b>                | Age (years)                                                   | Continuous  | 21003        |
|                                    | Sex (M/F)                                                     | Categorical | 31           |
|                                    | BMI ( $kg/m^2$ )                                              | Continuous  | 21001        |
|                                    | Waist Circumference (cm)                                      | Continuous  | 48           |
|                                    | Height (cm)                                                   | Continuous  | 12144        |
|                                    | Weight (cm)                                                   | Continuous  | 21002        |
| <b>Biomarker Data</b>              | Haemoglobin                                                   | Continuous  | 30020        |
|                                    | Systolic Pressure (mmHg)                                      | Continuous  | 4080         |
|                                    | Diastolic Pressure (mmHg)                                     | Continuous  | 4079         |
|                                    | Pulse Wave Arterial Stiffness Index                           | Continuous  | 21021        |
|                                    | Red Blood Cell Count ( $10^{12}cells/L$ )                     | Continuous  | 30010        |
|                                    | White Blood Cell Count ( $10^9cells/L$ )                      | Continuous  | 30000        |
|                                    | Platelet count ( $10^9cells/L$ )                              | Continuous  | 30080        |
|                                    | Extracellular Glomerular Cellular Rate (EGCR) ( $\mu mol/L$ ) | Continuous  | 30700        |
| <b>Self-reported Comorbidities</b> | Diabetes                                                      | Binary      | 2443         |
|                                    | Eye diabetes                                                  | Binary      | 6148         |
|                                    | Health Rating                                                 | Categorical | 2178         |
|                                    | Stroke dad                                                    | Binary      | 20107        |
|                                    | Stroke mom                                                    | Binary      | 20110        |
|                                    | Stroke siblings                                               | Binary      | 20111        |
|                                    | Breathe Shortness                                             | Binary      | 4717         |
|                                    | Anxiety Visit                                                 | Binary      | 2090         |
|                                    | Chest Pain                                                    | Binary      | 2335         |
| <b>Registered Comorbidities</b>    | Stenosis                                                      | Binary      | 132          |
|                                    | Kidney                                                        | Binary      | 132052       |
|                                    | Diabetes                                                      | Binary      | 2443         |
|                                    | High Cholesterol                                              | Binary      | 30760        |
|                                    | Angina                                                        | Binary      | 3627         |

| Category                  | Feature (unit)                                                            | Type        | UKB Field ID |
|---------------------------|---------------------------------------------------------------------------|-------------|--------------|
|                           | Dementia                                                                  | Binary      | 42018        |
|                           | Thyrotoxicosis                                                            | Binary      | 130700       |
|                           | Migraine                                                                  | Binary      | 131052       |
|                           | Previous_stroke                                                           | Binary      | 6150         |
|                           | Embolism                                                                  | Binary      | 4022         |
|                           | Myocardial Infarction (MI)                                                | Binary      | 42000        |
|                           | Age Deep-Vein Thrombosis (DVT) diagnosed (years)                          | Binary      | 4012         |
|                           | Transient Ischemic Attack (TIA)                                           | Binary      | 6156         |
|                           | Atrial Fibrillation (AF)                                                  | Binary      | 131350       |
|                           | Vascular Heart Problems                                                   | Binary      | 6158         |
| <b>Lifestyle Features</b> | Smoking status                                                            | Binary      | 1239         |
|                           | Alcohol Intake                                                            | Categorical | 1558         |
|                           | Diet Salt                                                                 | Categorical | 1548         |
|                           | Physical Activity (number of days/week)                                   | Continuous  | 884          |
|                           | Time TV (hr/day)                                                          | Continuous  | 1070         |
|                           | Time Mobile (hr/day)                                                      | Categorical | 1120         |
|                           | Time PC (hr/day)                                                          | Continuous  | 1080         |
|                           | Sleep Duration (hr/day)                                                   | Continuous  | 1160         |
|                           | Coffee Intake (cups/day)                                                  | Continuous  | 1498         |
| <b>Medication</b>         | Cholesterol                                                               | Binary      | 6177         |
|                           | Pressure                                                                  | Binary      | 6177         |
|                           | Insulin                                                                   | Binary      | 6177         |
|                           | Hormone                                                                   | Binary      | 6153         |
|                           | Pill                                                                      | Binary      | 3536         |
| <b>Brain IDPs</b>         | Total Volume of White Matter Hyperintensities ( $mm^3$ )                  | Continuous  | 25781        |
|                           | Total Volume of Deep White Matter Hyperintensities ( $mm^3$ )             | Continuous  | 24486        |
|                           | Total Volume of Periventricular White Matter Hyperintensities ( $mm^3$ )  | Continuous  | 24485        |
|                           | Volume of brain grey and white matter normalised for head size ( $mm^3$ ) | Continuous  | 25009        |
|                           | Volume of brain grey matter normalised for head size ( $mm^3$ )           | Continuous  | 25005        |

| <b>Category</b> | <b>Feature (unit)</b>                                                     | <b>Type</b> | <b>UKB Field ID</b> |
|-----------------|---------------------------------------------------------------------------|-------------|---------------------|
|                 | Discrepancy between T1 brain image and standard-space brain template (AU) | Continuous  | 25736               |
